# Supplementary material for: Optimal Design of Galvanic Vestibular Stimulation for Patients with Vestibulopathy and Cerebellar Disorders
Source: MDPI journal article supplement (doi:10.3390/brainsci13091333), 2023-09-16
Supplement: s1 [file s1]

Supplementary Table S1. Representation of the appearance of spontaneous spinning or tilting sensation in patients when applying GVS

| Pt. | Classification | Modes      |   |   |   |   |   |       |   |   |    |    |    |                     |    |    |    |    |    |
|-----|----------------|------------|---|---|---|---|---|-------|---|---|----|----|----|---------------------|----|----|----|----|----|
|     |                | Sinusoidal |   |   |   |   |   | Noisy |   |   |    |    |    | Direct current (DC) |    |    |    |    |    |
|     |                | 1          | 2 | 3 | 4 | 5 | 6 | 7     | 8 | 9 | 10 | 11 | 12 | 13                  | 14 | 15 | 16 | 17 | 18 |
| 1   | Acute UVP      | -          | - | - | - | - | - | -     | - | - | -  | -  | -  | -                   | -  | -  | -  | +  | +  |
| 2   | Acute UVP      | -          | - | - | - | - | - | -     | - | - | -  | -  | -  | -                   | -  | -  | +  | -  | +  |
| 3   | Acute UVP      | -          | - | - | - | - | - | -     | - | - | -  | -  | -  | -                   | -  | -  | -  | -  | -  |
| 4   | Acute UVP      | -          | - | - | - | - | - | -     | - | - | -  | -  | -  | -                   | -  | -  | -  | +  | +  |
| 5   | Acute UVP      | -          | - | - | - | - | - | -     | - | - | -  | -  | -  | -                   | -  | -  | -  | +  | -  |
| 6   | Acute UVP      | -          | - | - | - | - | - | -     | - | - | -  | -  | -  | -                   | -  | -  | -  | -  | -  |
| 7   | Acute UVP      | -          | - | - | - | - | - | -     | - | - | -  | -  | -  | -                   | -  | -  | -  | -  | +  |
| 8   | Chronic UVP    | -          | - | - | - | - | - | -     | - | - | -  | -  | -  | -                   | -  | -  | -  | -  | +  |
| 9   | Chronic UVP    | -          | - | - | - | - | - | -     | - | - | -  | -  | -  | -                   | -  | -  | -  | -  | -  |
| 10  | Chronic BVP    | -          | - | - | - | - | - | -     | - | - | -  | -  | -  |                     |    |    |    |    |    |
| 11  | Chronic BVP    | -          | - | - | - | - | - | -     | - | - | -  | -  | -  |                     |    |    |    |    |    |
| 12  | Chronic BVP    | -          | - | - | - | - | - | -     | - | - | -  | -  | -  |                     |    |    |    |    |    |
| 13  | Chronic BVP    | -          | - | - | - | - | - | -     | - | - | -  | -  | -  |                     |    |    |    |    |    |
| 14  | Chronic BVP    | -          | - | - | - | - | - | -     | - | - | -  | -  | -  |                     |    |    |    |    |    |
| 15  | Chronic BVP    | -          | - | - | - | - | - | -     | - | - | -  | -  | -  |                     |    |    |    |    |    |
| 16  | Chronic BVP    | -          | - | - | - | - | - | -     | - | - | -  | -  | -  |                     |    |    |    |    |    |
| 17  | Chronic BVP    | -          | - | - | - | - | - | -     | - | - | -  | -  | -  |                     |    |    |    |    |    |
| 18  | Chronic BVP    | -          | - | - | - | - | - | -     | - | - | -  | -  | -  |                     |    |    |    |    |    |
| 19  | CA             | -          | - | - | - | - | - | -     | - | - | -  | -  | -  |                     |    |    |    |    |    |
| 20  | CA             | -          | - | - | - | - | - | -     | - | - | -  | -  | -  |                     |    |    |    |    |    |
| 21  | CA             | -          | - | - | - | - | - | -     | - | - | -  | -  | -  |                     |    |    |    |    |    |
| 22  | CA             | -          | - | - | - | - | - | -     | - | - | -  | -  | -  |                     |    |    |    |    |    |
| 23  | CA             | -          | - | - | - | - | - | -     | - | - | -  | -  | -  |                     |    |    |    |    |    |
| 24  | CA             | -          | - | - | - | - | - | -     | - | - | -  | -  | -  |                     |    |    |    |    |    |
| 25  | CA             | -          | - | - | - | - | - | -     | - | - | -  | -  | -  |                     |    |    |    |    |    |
| 26  | CA             | -          | - | - | - | - | - | -     | - | - | -  | -  | -  |                     |    |    |    |    |    |
| 27  | CA             | -          | - | - | - | - | - | -     | - | - | -  | -  | -  |                     |    |    |    |    |    |
| 28  | CA             | -          | - | - | - | - | - | -     | - | - | -  | -  | -  |                     |    |    |    |    |    |
| 29  | CA             | -          | - | - | - | - | - | -     | - | - | -  | -  | -  |                     |    |    |    |    |    |
| 30  | CA             | -          | - | - | - | - | - | -     | - | - | -  | -  | -  |                     |    |    |    |    |    |
| 31  | CA             | -          | - | - | - | - | - | -     | - | - | -  | -  | -  |                     |    |    |    |    |    |

UVP=unilateral vestibulopathy; BVP=bilateral vestibulopathy; CA=cerebellar ataxia; + indicates the presence of a spinning or tingling sensation; - indicates the absence of a spinning or tingling sensation
